# Supplementary material for: An ICT based ultraselective and sensitive fluorescent probe for detection of HClO in living cells
Source: Royal Society of Chemistry journal article supplement (doi:10.1039/c5ra16097a), 2015-01-01
Supplement: c5ra16097a1.pdf [file c5ra16097a1.pdf]

## **Supporting Information (SI)**

for

### **An ICT Based Ultrasensitivity Fluorescent Probe for Detection of HClO in Living Cells**

Yongkang Yue,<sup>a</sup> Fangjun Huo,<sup>b</sup> Caixia Yin,<sup>\*a</sup> Jianbin Chao,<sup>b</sup> §Yongbin Zhang,<sup>b</sup>  
Xing Wei<sup>a</sup>

#### **Table of contents:**

**Figure S1:** Structure characterization of compound **2**

**Figure S2:** Structure characterization of probe **1**

**Figure S3:** Structure characterization of compound **3**

**Figure S4:** Crystal data of probe **1**

**Figure S5:** UV-vis spectra of probe **1** towards HClO

**Figure S6:** Fluorescent kinetic analysis

## Materials and Chemicals

All chemicals were purchased from commercial suppliers and used without further purification. All solvents were purified prior to use. Distilled water was used after passing through a water ultrapurification system. TLC analysis was performed using precoated silica plates. Hitachi F-7000 fluorescence spectrophotometer was employed to measure fluorescence spectra. Shanghai Huamei Experiment Instrument Plants, China provided a PO-120 quartz cuvette (10 mm).  $^1\text{H}$  NMR and  $^{13}\text{C}$  NMR experiments were performed with a Bruker AVANCE-300 MHz and 75 MHz NMR spectrometer, respectively (Bruker, Billerica, MA). Coupling constants ( $J$  values) are reported in hertz. ESI determinations were carried out on an LTQ-MS (Thermo) instrument. The cell imaging experiment was measured by laser confocal fluorescence imaging using a Leica TCS SP5 laser scanning microscope. The red single crystal of probe was mounted on a glass fiber for data collection. Cell constants and an orientation matrix for data collection were obtained by least-squares refinement of diffraction data from reflections within  $2.556\text{--}27.475^\circ$ , using a Bruker SMART APEX CCD automatic diffractometer. Data were collected at 173 K using Mo  $K\alpha$  radiation ( $\lambda = 0.71073 \text{ \AA}$ ) and the  $\omega$ -scan technique, and corrected for the Lorentz and polarization effects (SADABS).<sup>s1</sup> The structures were solved by direct methods (SHELX97),<sup>s2</sup> and subsequent difference Fourier maps were inspected and then refined in  $F2$  using a full-matrix least-squares procedure and anisotropic displacement parameters.

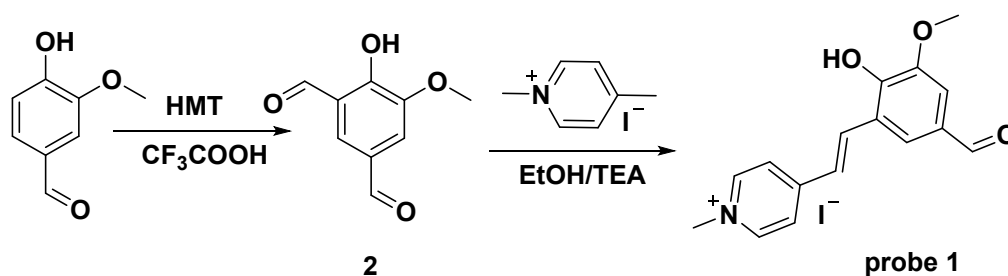

**Synthesis of Compound 2.** Vanillin (0.304 g, 2 mM) and hexamethylenetetramine (1.2 equiv.) were dissolved in TFA and the solution was heated at  $100^\circ\text{C}$  for 4 h. Approximately 10 mL 3 M HCl was added and the solution was heated at  $100^\circ\text{C}$  for 1 h. After cooling to room temperature, the mixture was extracted with 20 mL  $\text{CH}_2\text{Cl}_2$  for three times. The organic layer was dried over magnesium sulfate and concentrated under reduced pressure to afford 0.299 g (1.6 mM, 83%) yellow solid.  $^1\text{H}$  NMR (DMSO- $d_6$ , 300 MHz):  $\delta$  (ppm) = 3.95 (s, 3 H), 7.61 (s, 1 H), 7.88 (s, 1 H), 9.88 (s, 1 H), 10.36 (s, 1 H), 11.34 (s, 1 H);  $^{13}\text{C}$  NMR (DMSO- $d_6$ , 75 MHz): 55.1, 112.1, 121.2, 123.6, 126.8, 148.0, 154.8, 189.0, 189.9. ESI-MS  $m/z$ : Calcd for  $\text{C}_9\text{H}_7\text{O}_4$  179.03; Found 178.83 (Fig. S1)

**Synthesis of Probe 1.** Compound 2 (0.18 g, 1 mM), trimethylamine (1 equiv.) and 1,4-dimethylpyridinium-1-ium iodide (0.235 g, 1 mM) was dissolved in anhydrous ethanol (20 mL). The reaction mixture was then refluxed for 14 h. The solution was then removed under reduced pressure. The crude product was purified on a silica gel column using ethanol and then methanol to afford 0.201 g (0.5 mM, 51%) probe 1 as red solid.  $^1\text{H}$  NMR (DMSO- $d_6$ , 300 MHz): 3.64 (s, 3H), 4.09 (s, 3H), 6.80 (s, 1H), 7.47 (s, 1H), 7.60 (d, 1H,  $J = 15.6$ ), 7.87 (d, 1H,  $J = 6.3$ ), 7.99 (d, 1H,  $J = 15.9$ ), 8.47 (d, 1H,  $J = 6.3$ ), 9.35 (s, 1 H);  $^{13}\text{C}$  NMR (DMSO- $d_6$ , 75 MHz): 45.4, 54.4,

115.0, 117.5, 120.7, 142.1, 143.2, 153.0, 154.8, 171.6, 186.5. Crystal data for C<sub>16</sub>H<sub>16</sub>NO<sub>3</sub>I: crystal size: 0.14 × 0.11 × 0.08 mm<sup>3</sup>, space group Pnma. *a* = 6.385 (13) Å, *b* = 16.788 (4) Å, *c* = 7.974 (16) Å, *V* = 854.1 (16) Å<sup>3</sup>, *Z* = 2, *T* = 173 K,  $\theta_{\max}$  = 27.48°, 9558 reflections measured, 3768 unique (*R*<sub>int</sub> = 0.0317) Final residual for 251 parameters and 3768 reflections with *I* > 2σ(*I*): *R*<sub>1</sub> = 0.0353, *wR*<sub>2</sub> = 0.0915 and GOF = 1.084 (Fig. S4).

**Preparation of Solutions of Probe 1 and Analytes.** Stock solution of probe 1 (2 mM) was prepared in DMSO. Stock solutions of ClO<sup>-</sup> (2 mM), ClO<sub>2</sub><sup>-</sup>, IO<sub>4</sub><sup>-</sup>, CN<sup>-</sup>, HS<sup>-</sup> and HSO<sub>3</sub><sup>-</sup> (200mM) were prepared by direct dissolution of proper amounts of sodium salts in deionized water. All chemicals used were of analytical grade. Superoxide solution (O<sub>2</sub><sup>•-</sup>) was prepared by adding KO<sub>2</sub> (1.0 mg) to dry dimethylsulfoxide (1.0 mL) and stirring vigorously for 10 min. Hydroxyl radical (•OH) was obtained from the Fenton reaction of Ferrous perchlorate and hydrogen peroxide. Single oxygen (<sup>1</sup>O<sub>2</sub>) was generated by mixing H<sub>2</sub>O<sub>2</sub> with NaOCl sequentially. ROO• was generated from 2,2'-azobis(2-amidinopropane)dihydrochloride. Nitric oxide was generated from SNP (Sodium Nitroferricyanide (III) Dihydrate). SNP in deionizer water was added then stirred for 30 min at 25°C. <sup>s4-s6</sup>

**General fluorescence spectra measurements.** All the detection experiments were measured in DMSO–Hepes buffer (3:1, v/v, pH 7.4). The procedure was as follows: into a DMSO–Hepes buffer (3:1, v/v, pH 7.4) solution, containing 50 μM probe 1, a HClO sample was gradually titrated. The process was monitored by fluorescence spectrometer (λ<sub>ex</sub> = 373 nm, λ<sub>em</sub> = 468 nm, slit: 5 nm/5 nm).

**Cell Culture and Imaging.** The HepG2 cells were cultured in 1× SPP medium (1% proteose peptone, 0.2% glucose, 0.1% yeast extract, 0.003% EDTA ferricsodium salt) at 30 °C. Some of the HepG2 were treated with 30 μM of probe 1 (DMSO stock solution) in culture media for 30 min at 37 °C and washed 3 times with PBS. Meanwhile, another portion of HepG2 cells were incubated with probe 1 (30 μM DMSO stock solution) for 30 min at 37 °C with 10 μM, 20 μM, 30 μM of HClO added for the final 30 min. Cell imaging was then carried out after washing cells with PBS buffer.

## REFERENCES

- s1 G.M. Sheldrick, SADABS, *Germany University of Gottingen*, 1997.
- s2 G.M. Sheldrick, Program for the Refinement of Crystal Structure, University of Goettingen, Germany, 1997. Sheldrick, G.M. Program for the Refinement of Crystal Structure, University of Goettingen, Germany, 1997.
- s3 A. Samanta, K.K. Maiti, K.S. Soh, X.J. Liao, M. Vendrell, U.S. Dinish, S.W. Yun, R. Bhuvanewari, H. Kim, S. Rautela, J. Chung, M. Olivo and Y.T. Chang, *Angew. Chem. Int. Ed.*, 2011, **50**, 6089.
- s4 X.H. Li, G.X. Zhang, H.M. Ma, D.Q. Zhang, J. Li and D.B. Zhu, *J. Am. Chem. Soc.*, 2004, **126**, 11543.
- s5 H.T. Zhao, S. Kalivendi, H. Zhang, J. Joseph, K. Nithipatikom, J. Vasquez-Vivar and B. Kalyanaraman, *Free Radical Biology & Medicine* 2003, **34**, 1359.
- s6 Z.N. Sun, F.Q. Liu, Y. Chen, P.K. H. Tam and D. Yang, *Org. Lett.*, 2008, **10**, 2171.

**Figure S1: Structure characterization of compound 2**

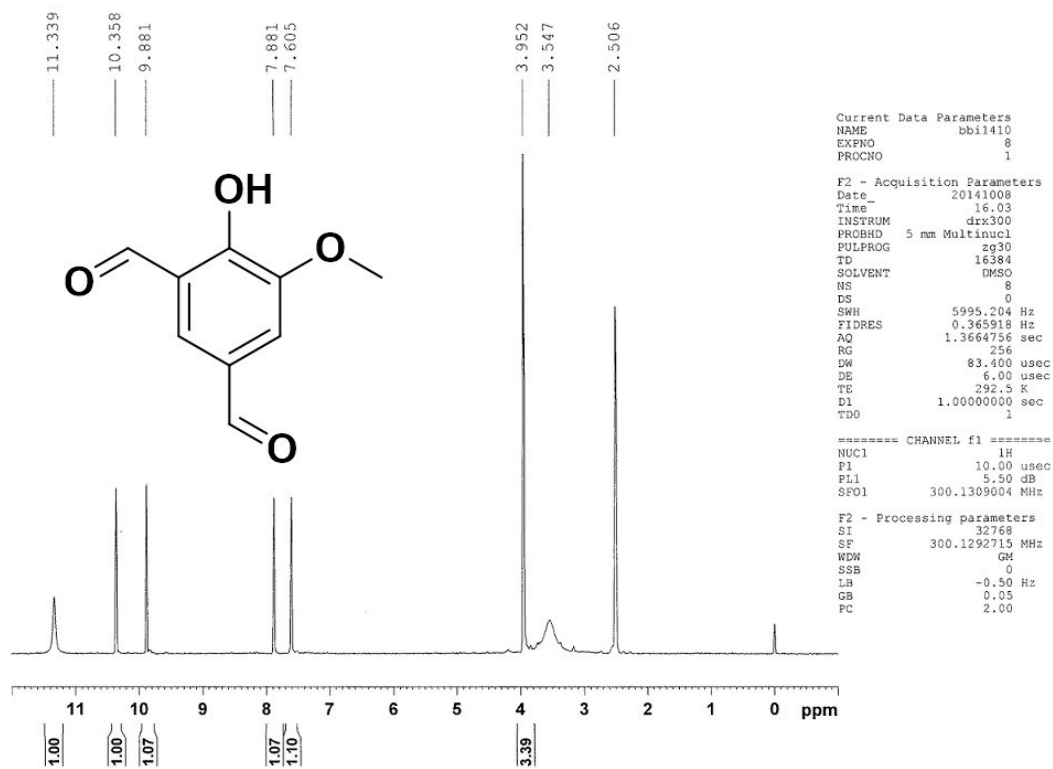

<sup>1</sup>H-NMR spectrum of compound 2 in DMSO-*d*<sub>6</sub>

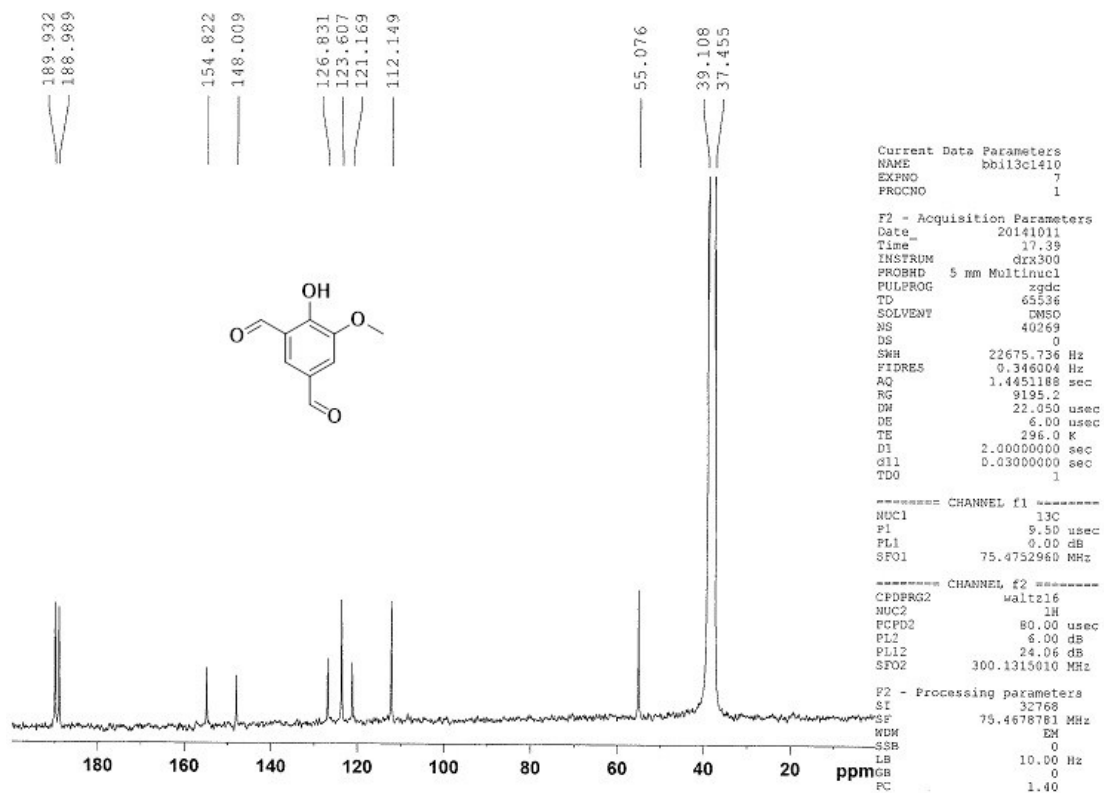

<sup>13</sup>C-NMR spectrum of compound 2 in DMSO-*d*<sub>6</sub>

9\_141018105756 #1 RT: 0.00 AV: 1 NL: 1.43E5  
 T: ITMS - p ESI Full ms [50.00-1000.00]

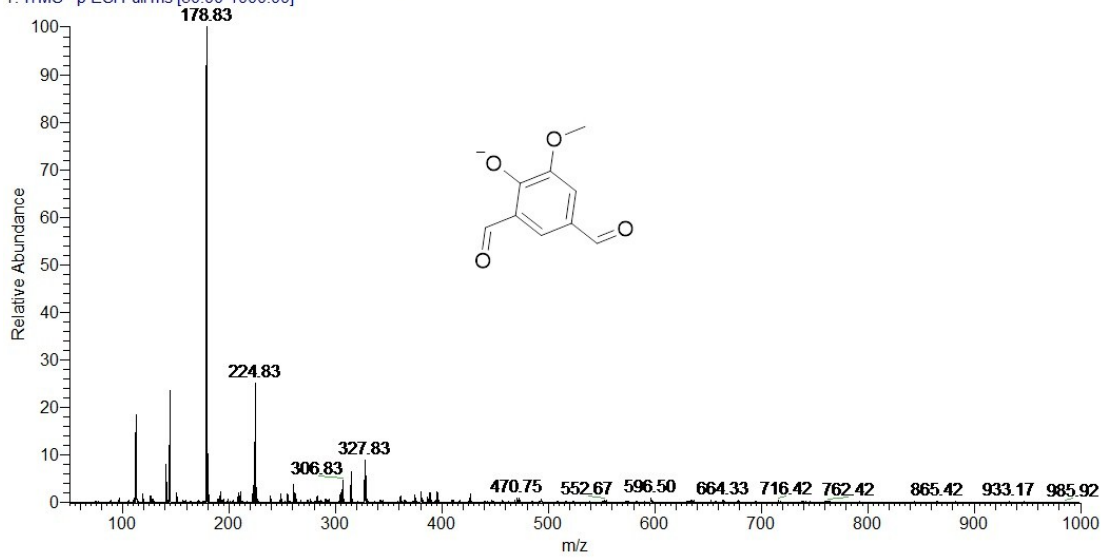

MS (ESI) spectrum of compound 2

Figure S2: Structure characterization of probe 1

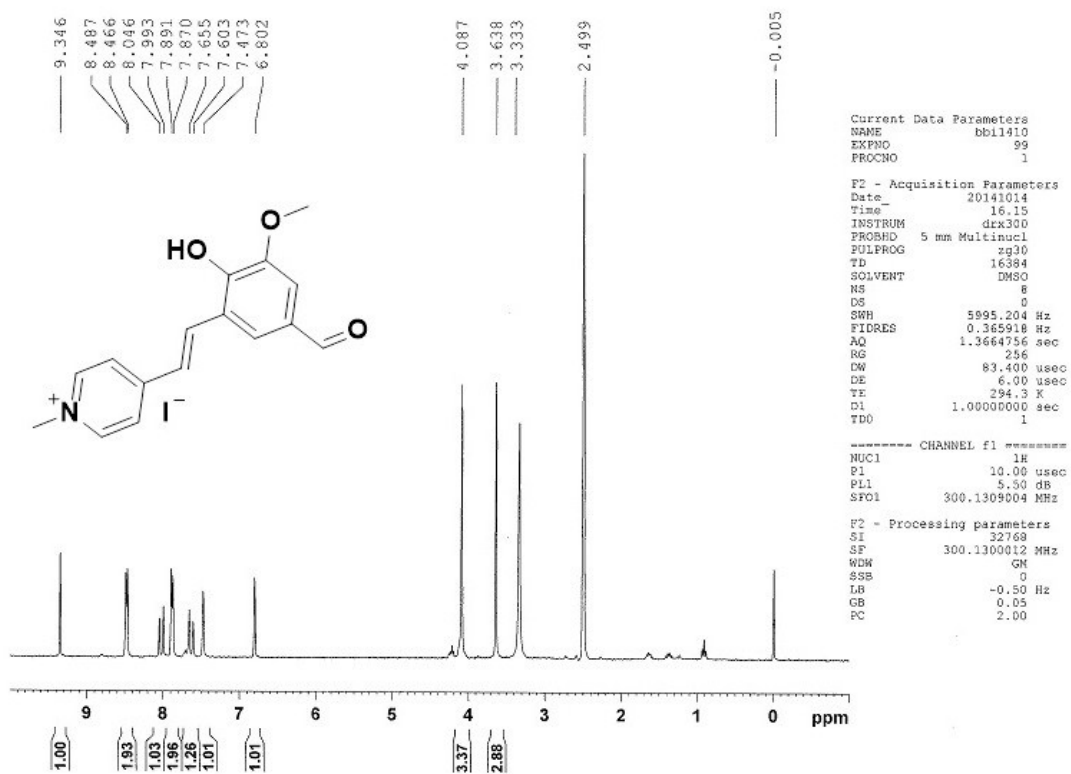

<sup>1</sup>H-NMR spectrum of probe 1 in DMSO-*d*<sub>6</sub>

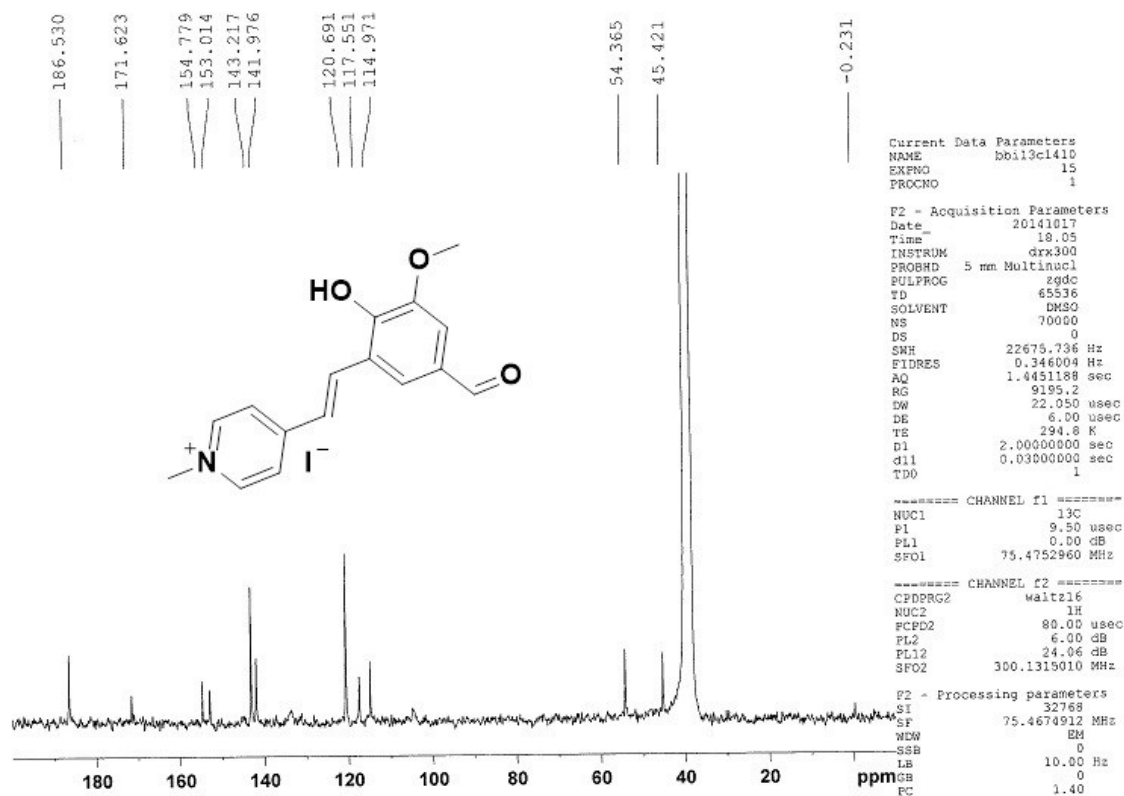

$^{13}\text{C}$ -NMR spectrum of probe **1** in  $\text{DMSO-}d_6$

**Figure S3:** Structure characterization of compound **3**

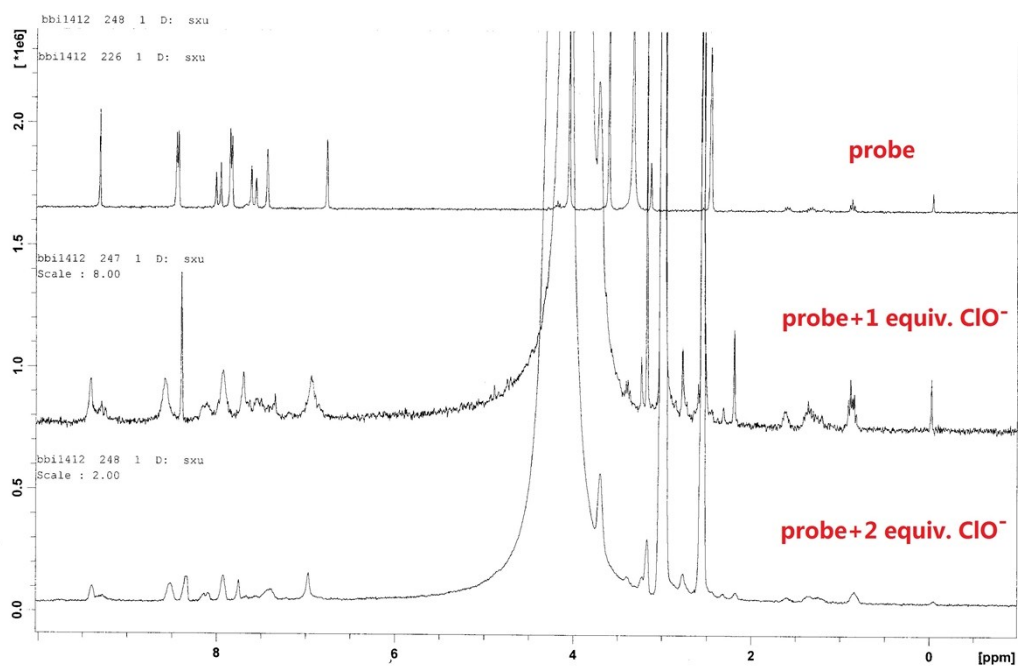

$^1\text{H}$ -NMR titration experiments of probe **1** upon addition of  $\text{HClO}$  in  $\text{DMSO-}d_6$

4\_+ #7 RT: 0.02 AV: 1 NL: 8.28E4  
T: ITMS + p ESI Full ms [150.00-2000.00]

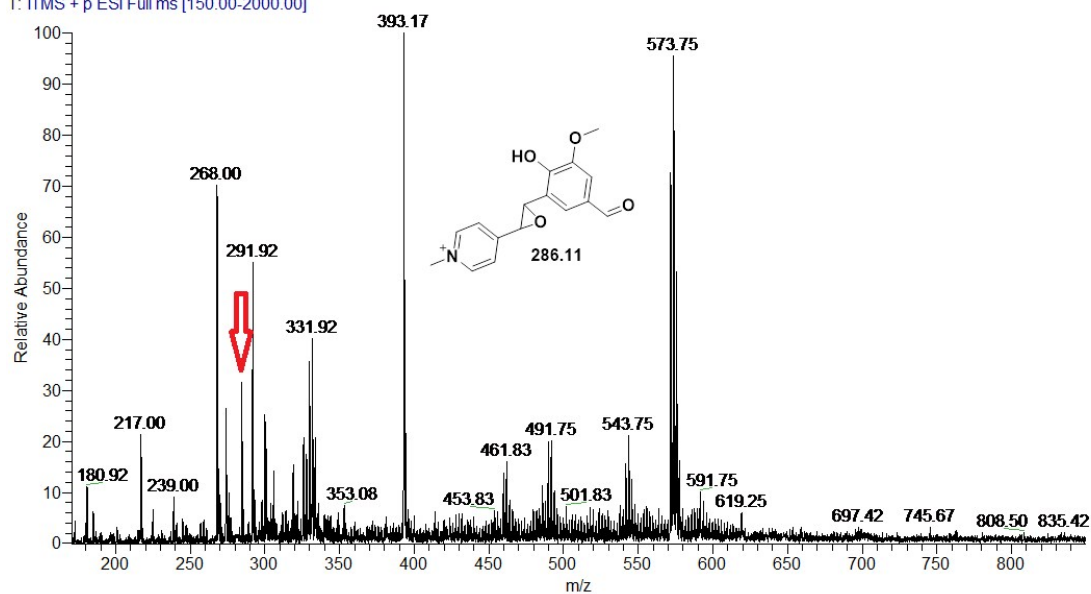

MS (ESI) spectrum of probe 1 upon addition of 1 equiv. HClO in MeOH

7\_150526102855 #14 RT: 0.03 AV: 1 NL: 2.66E4  
T: ITMS - p ESI Full ms [100.00-1000.00]

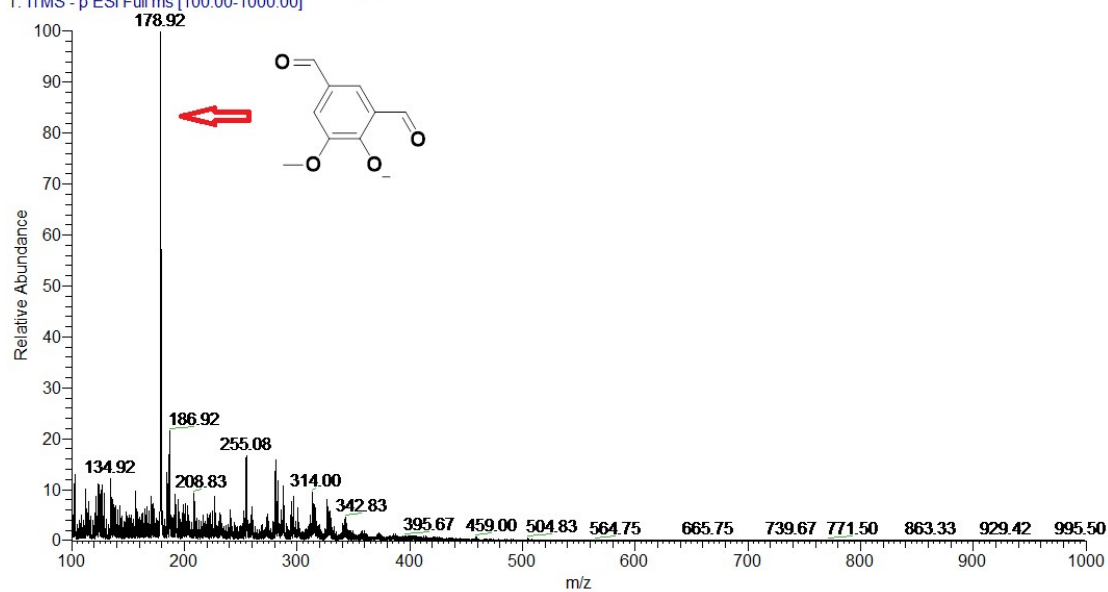

MS (ESI) spectrum of probe 1 upon addition of 2 equiv. HClO in MeOH

**Figure S4:** Crystal data of probe 1

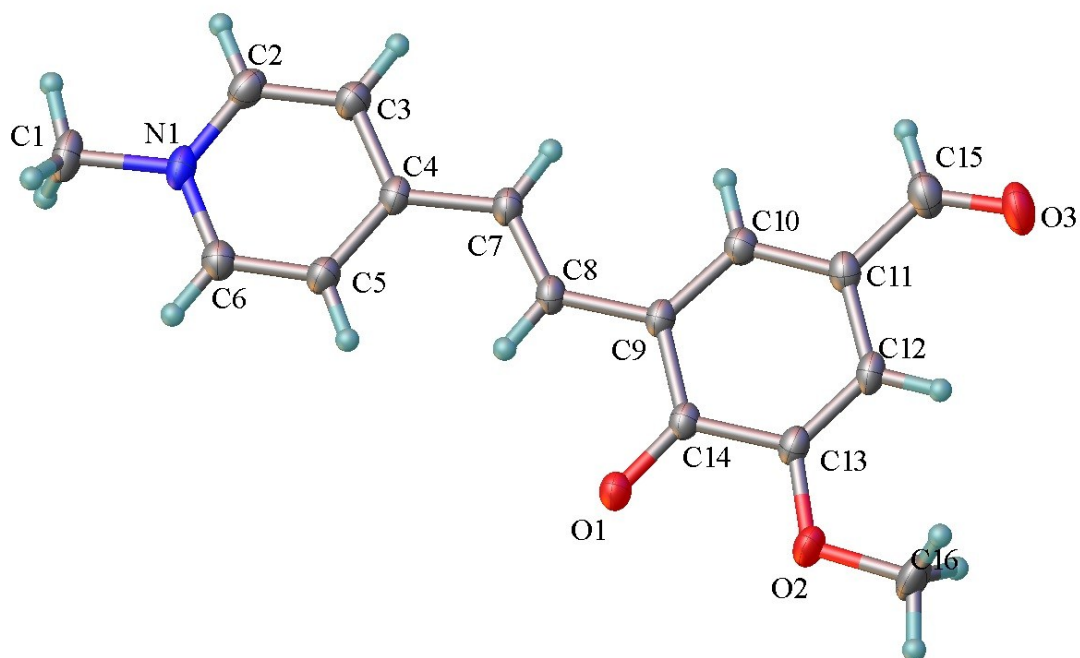

Table 1. Crystal data and structure refinement for mx3426.

|                                 |                                                  |                             |
|---------------------------------|--------------------------------------------------|-----------------------------|
| Identification code             | mx3426                                           |                             |
| Empirical formula               | C <sub>16</sub> H <sub>23</sub> N O <sub>7</sub> |                             |
| Formula weight                  | 341.35                                           |                             |
| Temperature                     | 173.1500 K                                       |                             |
| Wavelength                      | 0.71073 Å                                        |                             |
| Crystal system                  | Monoclinic                                       |                             |
| Space group                     | P 1 21 1                                         |                             |
| Unit cell dimensions            | a = 6.3846(13) Å                                 | $\alpha = 90^\circ$ .       |
|                                 | b = 16.788(4) Å                                  | $\beta = 92.052(4)^\circ$ . |
|                                 | c = 7.9738(16) Å                                 | $\gamma = 90^\circ$ .       |
| Volume                          | 854.1(3) Å <sup>3</sup>                          |                             |
| Z                               | 2                                                |                             |
| Density (calculated)            | 1.327 Mg/m <sup>3</sup>                          |                             |
| Absorption coefficient          | 0.104 mm <sup>-1</sup>                           |                             |
| F(000)                          | 364                                              |                             |
| Crystal size                    | 0.14 x 0.11 x 0.08 mm <sup>3</sup>               |                             |
| Theta range for data collection | 2.556 to 27.475°.                                |                             |
| Index ranges                    | -8 ≤ h ≤ 8, -21 ≤ k ≤ 21, -10 ≤ l ≤ 10           |                             |



|                                   |                                             |
|-----------------------------------|---------------------------------------------|
| Reflections collected             | 9558                                        |
| Independent reflections           | 3768 [R(int) = 0.0317]                      |
| Completeness to theta = 26.000°   | 99.5 %                                      |
| Absorption correction             | Semi-empirical from equivalents             |
| Max. and min. transmission        | 1.0000 and 0.7965                           |
| Refinement method                 | Full-matrix least-squares on F <sup>2</sup> |
| Data / restraints / parameters    | 3768 / 1 / 251                              |
| Goodness-of-fit on F <sup>2</sup> | 1.084                                       |
| Final R indices [I>2sigma(I)]     | R1 = 0.0353, wR2 = 0.0915                   |
| R indices (all data)              | R1 = 0.0363, wR2 = 0.0926                   |
| Absolute structure parameter      | -0.4(4)                                     |
| Extinction coefficient            | n/a                                         |
| Largest diff. peak and hole       | 0.210 and -0.145 e.Å <sup>-3</sup>          |

Figure S5: UV-vis spectra of probe **1** towards HClO

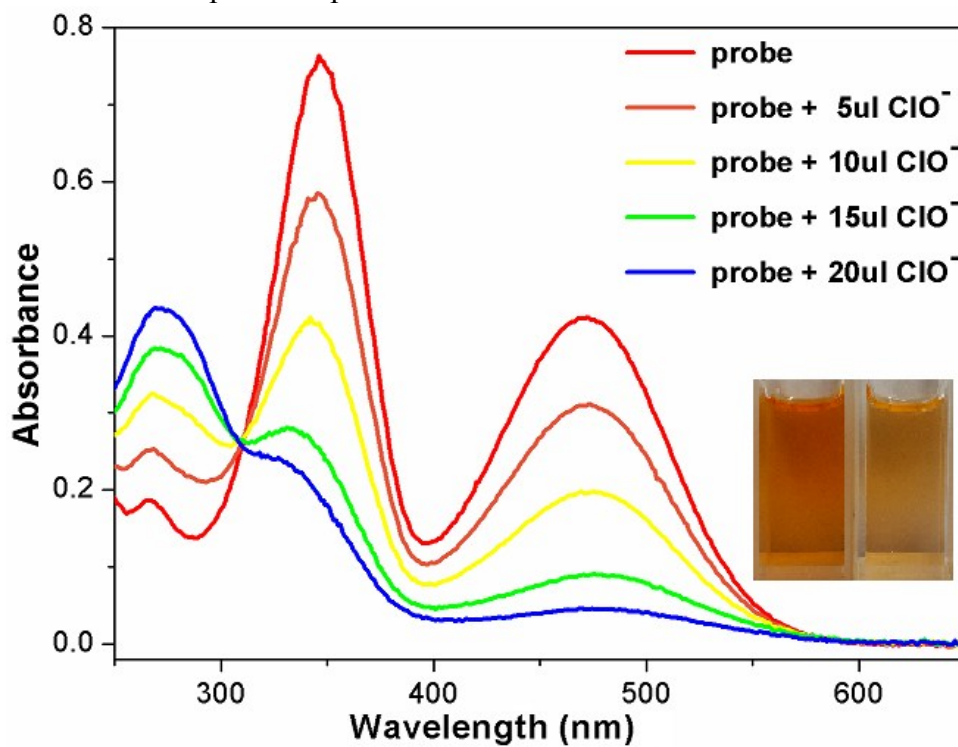

Figure S5a: UV-vis spectra of **1** (25  $\mu$ M) upon addition of HClO (20  $\mu$ M) in DMSO-Hepes buffer (3:1, v/v, pH 7.4) at 25  $^{\circ}$ C. Each spectrum was collected 30 s after adding of HClO.

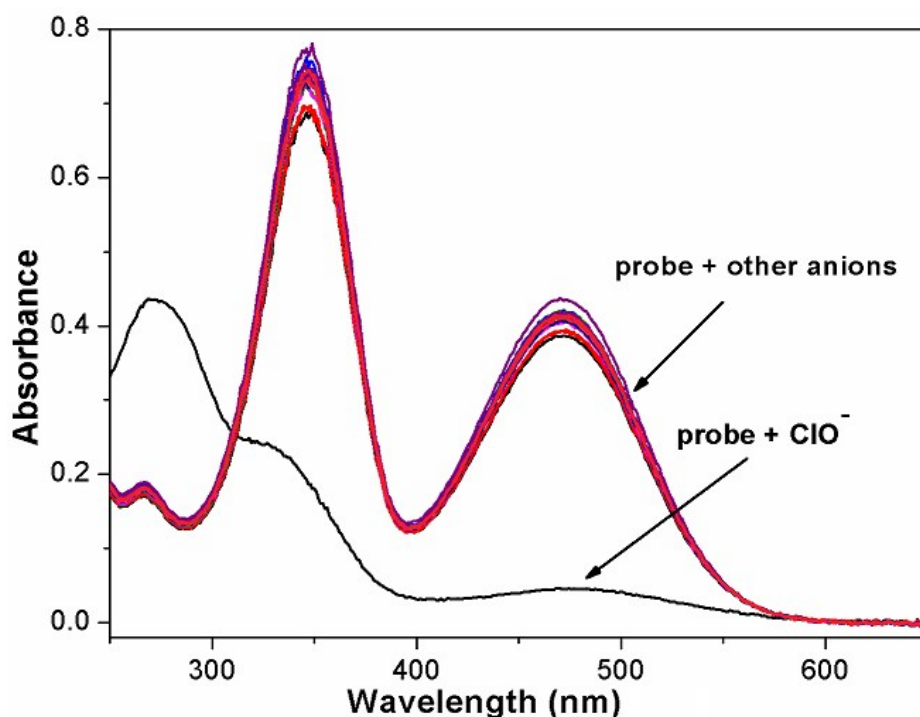

Figure S5b: UV-vis interference spectrum of probe **1** towards various analytes including ClO<sup>-</sup>, H<sub>2</sub>O<sub>2</sub>, <sup>1</sup>O<sub>2</sub>, NO, O<sub>2</sub><sup>•-</sup>, HO<sup>•</sup>, ClO<sub>2</sub><sup>-</sup>, IO<sub>4</sub><sup>-</sup>, ONOO<sup>-</sup>, ROO<sup>•</sup>, CN<sup>-</sup>, HS<sup>-</sup>, HSO<sub>3</sub><sup>-</sup> and Cys (20  $\mu$ M of **1** towards 1 equiv. of HClO and 100 equiv. of other anions in DMSO-Hepes buffer (3:1, v/v, pH 7.4)).

**Figure S6:** Fluorescent kinetic analysis

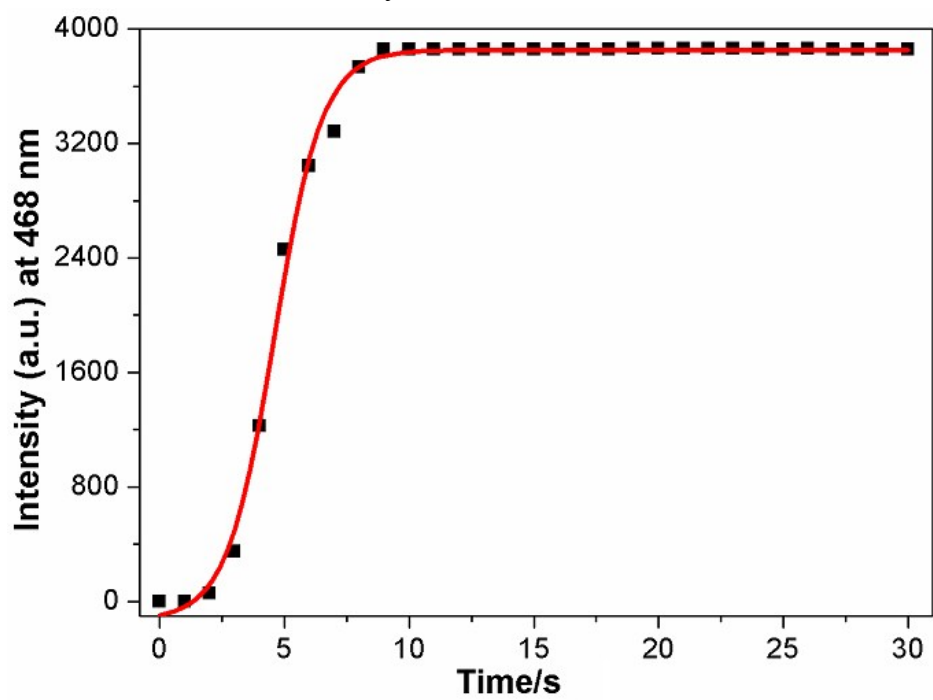

Figure S6: Kinetic analysis of probe **1** towards HClO ( $50 \mu\text{M}$  **1** with 10 equiv. of HClO).

**Figure S7:** The viability test of probe **1** in HepG2 cells

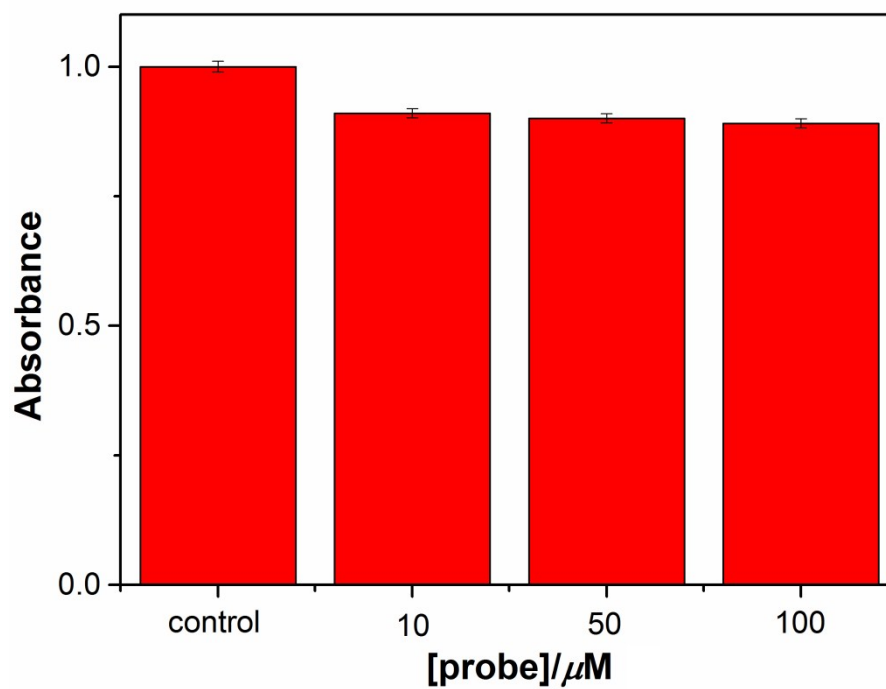

Figure S7: Viability of HepG2 cells in the presence of probe **1** (0-100 μM) as measured by CCK-8 kit. The cells were incubated with probe **1** for 1 h.
